# Supplementary material for: The rising global economic costs of Aedes and Aedes-borne diseases
Source: Research Square preprint supplement (doi:10.21203/rs.3.rs-2679030/v1), 2023-03-17
Supplement: Supplementary file 1 [file b6f80ebc16bcfa67f42b84c3.xlsx]

## Sheet: Db_descriptors
Summary_of_the_content_of_the_descriptive_columns_of_the_Aedescost_database
	Note: data fields in grey refer to columns originally appearing in the InvaCost database. For reproducibility, we retained the same categories that had been defined in this database. In green, data fields that are exclusive to the Aedes database. Note that, although the column Type_of_cost shares many categories used in the InvaCost database, it has been adapted to be more specific for Aedes-rela…
Column_name	Definition	Database version of first appearance	Categories
Cost_ID	Unique identifier for the cost entry. Does not match the identifier of the Invacost database	InvaCost_1.0
Source	For trazability purposes, the category corresponds to the source of the record - either from the InvaCost v.4 (Inv4) database, from the systematic update (SystUp) or the opportunistic update (OpUp).		1. Inv4 2. SystUp 3. OpUp
Inclusion_crit	This column is the result of the double-counting process and the data exclusion process using the same criteria described in Diagne et al. 2020. Cost records that are classified as conservative are those retained after the double-screening process. Modified cost records are those when only one year of information was retained (see the double-counting decision tree for more details). Records class…		1. Conservative 2. Modified 3. Noncons 4. Overlap 5. Sequelae 6. Tentative 7. Yellow fever
Reference_title	Title of the reference where the cost entry is reported	InvaCost_1.0
Authors	Authors of the reference where the cost entry is reported	InvaCost_1.0
Publication_year	Year of publication of the reference where the cost entry is reported	InvaCost_1.0
Language	Main language used in the original reference reporting the cost entry	InvaCost_2.0
Type_of_material	Type of reference analyzed (i.e. scientific peer-reviewed article or grey literature); for grey literature, the exact nature of the reference was indicated (e.g., official report, press release)	InvaCost_1.0	1. Peer-reviewed article 2. Official report (government, international NGO (e.g. WHO, PAHO, etc) 3. Magazine article (material published in a magazine for the general public) 4. Thesis (bachelor, master's, PhD) 5. News article (material published in newspaper citing official sources 6. Bulletin (short reports shared by NGOs, government or companies) 7. Conference poster 8. Press release
Previous_material	If any, the list of successive materials checked before reaching the original reference providing the cost entry
Availability	The accessibility of the original reference as a searchable document (yes/no)	InvaCost_1.0
Kingdom	Taxonomic kingdom of the invasive species associated with the cost entry	InvaCost_1.0
Phylum	Taxonomic phylum of the invasive species associated with the cost entry	InvaCost_1.0
Class	Taxonomic class of the invasive species associated with the cost entry	InvaCost_1.0
Order	Taxonomic order of the invasive species associated with the cost entry	InvaCost_1.0
Family	Taxonomic family of the invasive species associated with the cost entry	InvaCost_1.0
Genus	Taxonomic genus of the invasive species associated with the cost entry	InvaCost_1.0
Species	Taxonomic species of the invasive species associated with the cost entry	InvaCost_1.0
Subspecies	Taxonomic sub-species of the invasive species associated with the cost entry	InvaCost_3.0
Common_name	Non-scientific (or vernacular) name(s) provided in the original reference, or by the International Union for Conservation of Nature (IUCN) when not provided	InvaCost_1.0
Environment	Type of environment (aquatic, terrestrial, semi-aquatic, diverse/unspecified) where the cost estimate occurred	InvaCost_1.0
Environment_IAS	Type of environment where the invasive species lives, independently of where the cost occurred: aquatic (species with a close association with aquatic systems at any life stage, including for reproduction, development and/or foraging), semi-aquatic (species with a looser association with aquatic systems) or terrestrial (otherwise); diverse/unspecified is used when there are multiple IAS pertainin…	InvaCost_3.0
Island	Assessment of the geographical area where the cost occurred as an island (Y) or not (N); NA is used when the information is not clearly provided or unknown	InvaCost_2.0
Geographic_region	Geographical region(s) where the cost occurred	InvaCost_1.0	1. Africa 2. Asia 3. North America 4. South America 5. Central America 6. Europe 7. Oceania 8. Multiple 9. Unspecified
Official_country	Country where the cost occurred; sometimes, this is not congruent with the geographic region as some territories (e.g., overseas areas) are located in another continent than their official country of attachment	InvaCost_1.0
State|Province|Administrative_area	The second level of geographic division (state, province or territory) for the official country where the cost occurred	InvaCost_2.0
Location	When provided, the precise location (e.g., city, area) where the cost estimate occurred	InvaCost_1.0
Spatial_scale	Order of magnitude of the extent, size of the land/water area where the costs incurred. Options include: global (worldwide-scale), intercontinental (areas from two or more geographic regions), continental ('Geographic region' level), regional (several countries within a single 'Geographic region'), country, site (area at intra-country level, including USA states) and unit (well-defined surface ar…	InvaCost_1.0	1. Global 2. Intercontinental 3. Continental 4. Regional 5. Country 6. Site 7. Unit
Period_of_estimation	If provided, the exact period of time covered by the cost, otherwise the raw formulation provided in the reference analyzed (e.g. late 90s, during 5 years)	InvaCost_1.0
Time_range	Two options: period if the cost is given for a period exceeding a year; or year if the cost is given yearly or for a period up to one year. Alternatively if no information is given in the source it can be mentioned Unspecified.	InvaCost_1.0	1. Period 2. Year 3. Unspecified
Probable_starting_year	Year in which the cost is known or assumed to have started to occurred. When not explicitly provided by the authors, we mentioned unspecified; in the case of a cost estimate provided for a one-year period straddling two calendar years, we mentioned the latest year of the cost occurrence.	InvaCost_1.0
Probable_ending_year	Year in which the cost is known or assumed to have ended. When not explicitly provided by the authors, we mentioned unspecified; in the case of a cost estimate provided for a one-year period straddling two calendar years, we mentioned the latest year of the cost occurrence.	InvaCost_3.0
Probable_starting_year_adjusted	Probable starting year and Probable ending year columns where the cells with unspecified information are replaced, as much as possible, by a specific year from educated guesses based on the duration time provided in the original reference (see Period of estimation column). When relevant (e.g. the authors provide a cost that occurs "since/for a well-defined number of years"), we considered the ‘Pu…
Probable_ending_year_adjusted	Probable starting year and Probable ending year columns where the cells with unspecified information are replaced, as much as possible, by a specific year from educated guesses based on the duration time provided in the original reference (see Period of estimation column). When relevant (e.g. the authors provide a cost that occurs "since/for a well-defined number of years"), we considered the ‘Pu…
Occurrence	Status of the cost estimate as potentially ongoing (if the cost can be expected to continue over time) or one-time (if the cost was deemed as unlikely to continue)	InvaCost_1.0
Raw_cost_estimate_local_currency	Cost estimate directly retrieved from the analyzed reference	InvaCost_1.0
Min_Raw_cost_estimate_local_currency	Lower boundary of the Raw cost estimate local currency (if a range of estimates was provided by the authors)	InvaCost_1.0
Max_Raw_cost_estimate_local_currency	Higher boundary of the Raw cost estimate local currency (if a range of estimates was provided by the authors)	InvaCost_1.0
Raw_cost_estimate_2017_USD_exchange_rate	Raw cost estimate local currency standardised from local Currency and Applicable year to 2017 US$ based on the official market exchange rate (local currency unit per US$) provided by the World Bank Open Data (available at https://data.worldbank.org/indicator/PA.NUS.FCRF?end=2017&start=1960)	InvaCost_1.0
Raw_cost_estimate_2017_USD_PPP	Raw cost estimate local currency standardized to 2017 US$ based on the official Purchase Power Parity (PPP; local currency unit per US$) provided by the World Bank Open Data (available at https://data.worldbank.org/indicator/PA.NUS.PPP?end=2017&start=1990) and the Organisation for Economic Cooperation and Development (available at https://data.oecd.org/conversion/purchasing-powerparities-ppp.htm)	InvaCost_1.0
Cost_estimate_per_year_local_currency	Raw cost estimate local currency transformed to a cost estimate per year of the Period of estimation, which was obtained by dividing the raw cost estimate by the number of years between the Probable starting year_completed and Probable ending year_completed. Blank cells are those that have no information in at least one of these two previous columns	InvaCost_1.0
Cost_estimate_per_year_2017_USD_exchange_rate	Cost estimate per year local currency standardized from local Currency and Applicable year to 2017 USD based on the official market exchange rate (local currency unit per US$) provided by the World Bank Open Data (available at https://data.worldbank.org/indicator/PA.NUS.FCRF?end=2017&start=1960). Blank cells are those that have no information in at least one of these two previous columns	InvaCost_1.0
Cost_estimate_per_year_2017_USD_PPP	Cost estimate per year local currency standardized from local Currency and Applicable year to 2017 USD based on Purchase Power Parity (PPP; local currency unit per US$) provided by the World Bank Open Data (available at https://data.worldbank.org/indicator/PA.NUS.PPP?end=2017&start=1990) and the Organisation for Economic Cooperation and Development (available at https://data.oecd.org/conversion/p…	InvaCost_1.0
Currency	Currency of the Raw cost estimate local currency as extracted in the original reference (three letter abbreviation) (ISO currency codes)	InvaCost_1.0
Applicable_year	Year of the Currency value (not the year of the cost occurrence) considered for the conversion/standardization of the cost estimate	InvaCost_1.0
Type_of_applicable_year	Assessment of the applicable year as effective if explicitly stated by the authors or publication year if no explicit information was provided in the reference analyzed	InvaCost_1.0	1. Effective 2. Publication year
Implementation	This states — at the time of the estimation — whether the reported cost was actually observed (i.e., cost actually incurred) or potential (i.e., not incurred but expected cost)	InvaCost_1.0	1. Observed 2. Potential
Acquisition_method	Method used to obtain the cost estimate: report/estimation directly obtained or derived (using inference methods) from field-based information or extrapolation (cost predicted beyond the original spatial and/or temporal observation range from computational modelling, using data from another country or period)	InvaCost_1.0	1. Report/Estimation 2. Extrapolation
Impacted_sector	Sector impacted by the cost estimate in our socio-ecosystems: Agriculture (considered at its broadest sense, food and other useful products produced by human activities through using natural and/plant resources from their ecosystems such as crop growing, livestock breeding, beekeeping, land management); Authorities-Stakeholders (governmental services and/or official organisations such as conserva…	InvaCost_1.0
Cost_bearer	Who pays for the cost: Health provider (can be public or private or both, includes government-funded management for outbreaks or mosquito control), Individual (includes both the individual and household levels- costs that are paid out-of-pocket of the afflicted individuals or households), Community (administrative unit of analysis - state, country- that bears the large-scale costs resulting from …		1. Health provider 2. Individual 3. Community 4. Mixed categories (e.g. Health provider/Individual) 5. Unspecified
Type_of_cost	Costs incurred by Aedes-transmitted disease or presence. Damage cost subtypes can fit the following categories: Direct medical costs (any cost resulting from medical attention, including hospital costs, medication, treatment, etc.); Direct non-medical costs (costs associated with seeking medical attention, such as transportation costs, lodging, special food, etc); Indirect costs (costs relating t…	InvaCost_1.0	1. Direct medical costs 2. Direct non-medical costs 3. Indirect costs 4. Losses 5. Control 6. Surveillance 7. Prevention 8. Personal protection 9. Research & Funding
Type_of_cost_merged	Categories of the Type of cost column reassigned into Damage (economic losses due to direct and/or indirect impacts of invaders, such as yield loss, health injury, land alteration, infrastructure damage, or income reduction), Management (monetary resources allocated to mitigate the spread or impacts of invaders, such as prevention, control, research, long-term management, eradication) or Mixed (w…	InvaCost_3.0	1. Damage 2. Management 3. Mixed 4. Unspecified
Management_type	Pre-invasion management (monetary investments for preventing successful invasions in an area - including quarantine or border inspection, risk analyses, biosecurity management, etc.), post-invasion management (money spent for managing invasions in invaded areas - including control, eradication, containment), knowledge/funding (money allocated to all actions and operations that could be of interes…	InvaCost_3.0
Method_reliability	Assessment of the methodological approach used for cost estimation as of (i) high reliability if either provided by officially pre-assessed materials (peer-reviewed articles and official reports) or the estimation method was documented, repeatable and/or traceable if provided by other grey literature, or (ii) low reliability if not	InvaCost_1.0	1. High 2. Low
Method_reliability_refined	Assessment of the methodological approach used for cost estimation as of high or low reliability based on the evaluation of the estimation methodology by expert contributors	InvaCost_3.0
Method_reliability_Explanation	Detailed explanation why a particular methodological approach used for cost estimation was deemed as of high or low reliability based on expert opinion	InvaCost_3.0
Method_reliability_Expert_Name	Complete name and contact details of the expert had deemed the reliability of the cost entry	InvaCost_3.0
Overlap	List of cost estimates (individual Cost ID) that might overlap with other cost entry(s). It is noted like this: Z(V/W) when the overlap is known and one or more entries (V,W) are included in another entry (Z); when the overlap is not clear the quotation is Z/V/W	InvaCost_3.0
Details	When necessary, narrative elements deemed important either to understand the cost estimate or to support choices made for completing the database; this column was left unchanged from the original entries in order to allow trace-back investigations	InvaCost_1.0
Initial contributors_names	Name of contributor(s) having collated the cost entry	InvaCost_1.0
Double-checking	Assessment of cost information collated (by at least) two contributors; yes if it has been double checked, no if it has not. The names/contacts of each contributor are provided in the Contributors column	InvaCost_3.0
Disease	The disease that the cost is estimated for: Dengue, Zika, Chikungunya, Yellow fever. Also note, if no disease cost is estimated and the country does not have the presence of virus, costs are considered Nuisance costs (mostly for Europe). If costs cannot be associated with a single disease, then the combination of diseases present should be used (e.g. Dengue/Zika)		1. Dengue 2. Zika 3. Chikungunya 4. Yellow fever 5. Nuisance 6. Joint disease (e.g. Dengue/Zika)
Additional_processing	Detailed explanation of any modifications to obtain cost estimates (e.g. calculating a mean cost for a range, multiplying the number of patients times the unitary cost of disease treatment, etc.)

## Sheet: ref_full_list
Title	Source
A cost-effectiveness tool for informing policies on Zika virus control	Opp_update
A multi-country study of the economic burden of dengue fever based on patient-specific field surverys in Burkina Faso, Kenya and Cambodia	Systematic update
A multi-country study of the economic burden of dengue fever: Vietnam, Thailand, and Colombia	Opp_update
A private hospital-based study assessing knowledge, attitudes, practices and costs associated with dengue illness in Surat, India	Opp_update
A research study to assess the patient's expenditure suffering from dengue fever with respect to country's loss and patient's cure	Systematic update
A review of state public health emergency declarations in Peru: 2014-2016	Systematic update
A socio-economic impact assessment of the Zika virus in Latin America and the Caribbean: with a focus on Brazil, Colombia and Suriname	Opp_update
Aedes aegypti e sociedade: o impacto econômico das arboviroses no Brasil	InvaCost4
Aedes aegypti: economic impact of prevention versus palliation of diseases caused by the mosquito	InvaCost4
After the epidemic: Zika virus projections for Latin America and the Caribbean	Opp_update
An Economic Analysis of the Threats Posed by the Establishment of Aedes albopictus in Brisbane, Queensland	Opp_update
An economic evaluation of vector control in the age of a dengue vaccine	InvaCost4
An estimate of the global health care and lost productivity costs of dengue.	InvaCost4
an integrated pest control strategy against the asian tiger mosquito in northern italy: a case study	InvaCost4
Analisis costo-beneficio del control de vectores en la transmisión potencial de dengue	InvaCost4
Analisis costo-beneficio del control del dengue en el municipio de Magangu, Bolivar	InvaCost4
Analyse économique des espèces exotiques envahissantes en France, Première enquête nationale (2009-2013)	InvaCost4
Assessment of the social and economic impact of congenital Zika infection syndrome in women's lives and in the health system and validation of instruments	Opp_update
Assessment to support continued development of the EU Strategy to combat invasive alien species	InvaCost4
Burden of chikungunya in India: estimates of disability adjusted life years (DALY) lost in 2006 epidemic	Systematic update
Burden of dengue in the State of Meta, Colombia (2010-2016)	Systematic update
Burden of disease and economic impact of dengue and severe dengue in Colombia, 2011	InvaCost4
Burden of symptomatic dengue infection in children at primary school in Thailand: a prospective study	InvaCost4
Carga de enfermedad y costos directos de atencion medica del dengue en la ciudad de Cartagena de indias, 2007-2011	InvaCost4
CEPI awards up to US$14.1 million to consortium of IVI and Bharat Biotech to advance development of Chikungunya vaccine in collaboration with Ind-CEPI	Opp_update
CEPI awards up to US$23.4 million to Valneva for late-stage development of a single-dose chikungunya vaccine	Opp_update
Chikungunya outbreak (2017) in Bangladesh: Clinical profile, economic impact and quality of life during the acute phase of the disease	Systematic update
Citizen science provides a reliable and scalable tool to track disease-carrying mosquitoes.	InvaCost4
Clinical characteristics and national economic cost of the 2005 dengue epidemic in Panama	InvaCost4
Congress finally approves funding to fight Zika- but what does this mean?	Opp_update
Constitutional Principle of efficiency and the public policies for the control of Aedes aegypti at the Brazilian Ministry of Health: discouraging the search for more effective solutions	Systematic update
Controllo della Zanzara-Tigre: analisi dei costi sostenuti dagli Enti Locali. Emilia-Romagna Report 2008–2011	InvaCost4
Cost analysis of dengue from a state in South India	Systematic update
Cost and disease burden of dengue in Cambodia	InvaCost4
Cost effectiveness of Aedes aegypti control programmes: participatory versus vertical	InvaCost4
Cost effectiveness of community mobilization (Camino Verde) for dengue prevention in Nicaragua and Mexico: a cluster randomized trial	Systematic update
Cost effectiveness of screening for dengue infection in a UK teaching hospital	Systematic update
Cost of dengue cases in eight countries in the Americas and Asia: a prospective study	InvaCost4
Cost of dengue illness in Indonesia across hospitals, ambulatory and not medically attended settings	Systematic update
Cost of dengue in Thailand	InvaCost4
Cost of dengue outbreaks: literature review and country case studies	InvaCost4
Cost of dengue vector control activities in Malaysia	InvaCost4
Cost of illness study of patients with dengue hemorrhagic fever at one of the private hospitals in Yogyakarta	Systematic update
Cost of intensive routine control and incremental cost of insecticide-treated curtain deployment in a setting with low Aedes aegypti infestation	InvaCost4
Cost projections for implementation of safety interventions to prevent transufison-transmitted Zika virus infection in the United States	Systematic update
Cost-effectiveness analysis of VECTOS software for the control of diseases transmitted by Aedes aegypti in two Colombian municipalities
Cost-effectiveness of a Community-based Approach interviewed with a vertical Aedes Control Program	InvaCost4
Cost-effectiveness of annual targeted larviciding campaigns in Cambodia against the dengue vector Aedes aegypti	InvaCost4
Cost-effectiveness of Increasing Access to Contraception during the Zika Virus Outbreak, Puerto Rico, 2016	InvaCost4
Cost-effectiveness of Novel System of Mosquito surveillance and Control, Brazil	InvaCost4
Cost-Effectiveness of the Strategies to Reduce the Incidence of Dengue in Colima, Mexico	InvaCost4
Cost-of-Illness and the Health-Related Quality of Life of Patients in the Dengue Fever Outbreak in Hanoi in 2017	Systematic update
Costo total de atención del dengue CCSS: 1999-2002	Opp_update
Costos de internación del dengue en un hospital de tercer nivel de atención de Paraguay, 2017	Opp_update
Costos económicos asociados a la atención de pacientes con infección por Chikungunya en Colombia	Opp_update
Costs and sick leave due to chikungunya in the Instituto Mexicano del Seguro Social in Guerrero, Mexico	Systematic update
Costs of an Aedes aegypti vector control program in municipalities in Colombia: a case study in Girón and Guadalajara de Buga, 2016	InvaCost4
Costs of Dengue Control Activities and Hospitalizations in the Public Health Sector during an Epidemic Year in Urban Sri Lanka	InvaCost4
Costs of dengue in three French territories of the Americas: an analysis of the hospital medical information system (PMSI) database	InvaCost4
Costs of dengue prevention and incremental cost of dengue outbreak control in Guantanamo, Cuba	InvaCost4
Costs of Dengue to the Health System and Individuals in Colombia from 2010 to 2012	InvaCost4
Costs of the Municipal Dengue Control Program of Goiania, Brazil	InvaCost4
Coût d'une épidémie de dengue en Nouvelle-Calédonie. Une estimation pour la période 2012-2013	InvaCost4
Critical review of Aedes aegypti control programs in the Caribbean and selected neighboring countries.	InvaCost4
Dengue economic impact in Paraguay	Systematic update
Dengue endemic and its impact on the gross national product of Brazilian's economy	Systematic update
Dengue fever in the Indian subcontinent: an overview	InvaCost4
Dengue haemorrhagic fever control programme in Singapore: a case study on the successful control of Aedes aegypti and Aedes albopictus using mainly environmental measures as a part of integrated vector control	InvaCost4
Dengue haemorrhagic fever in Thailand, 1987.	InvaCost4
Dengue haemorrhagic fever/dengue shock syndrome: lessons from the Cuban epidemic, 1981.	InvaCost4
Dengue in Argentina: an economic analysis of the impact of the 2009 epidemic	InvaCost4
Dengue in the Pacific region	Opp_update
Dengue incidence and associated costs in the periods before (2000-2008) and after (2009-2013) the construction of the hydroelectric power plants in Rondonia, Brazil	InvaCost4
Dengue report	Opp_update
Dengue: Burden of disease and costs of illness	InvaCost4
Descuido de Costa Rica con dengue costó a la CCSS 10.254 millones	Opp_update
Direct cost of dengue hospitalization in Zhongshan, China: associations with demographics, virus types and hospital acreditation	Systematic update
Direct cost of illness for dengue in hospitalized children and adults at a referral hospital in India
Direct costs of dengue hospitalization in Brazil: public and private health care systems and use of WHO guidelines	InvaCost4
Direct costs of the dengue fever control and prevention program in 2005 in the City of Sao Paulo	InvaCost4
Direct medical costs of dengue fever in Vietnam: a retrospective study in a tertiary hospital	Systematic update
Disease and economic burden cost of dengue illness in India: an update from 2013 to 2017	Systematic update
Economic analysis of dengue prevention and case management in the Maldives	InvaCost4
Economic and disease burden of dengue	InvaCost4
Economic and Disease Burden of Dengue Illness in India	InvaCost4
Economic and disease burden of dengue in Mexico	InvaCost4
Economic and disease burden of dengue in Southeast Asia	InvaCost4
Economic and epidemiological impact of dengue illness over 16 years from a public health system perspective in Brazil to inform future health policies including the adoption of a dengue vaccine	InvaCost4
Economic and epidemiological impact of dengue in Brazil (2000-2015) from a public health system perspective: implications of adopting of a dengue vaccine	Systematic update
Economic burden of dengue illness in India from 2013 to 2016: A systematic analysis	InvaCost4
Economic burden of dengue in four major cities of Pakistan during 2011	Opp_update
Economic burden of dengue in Indonesia	Systematic update
Economic burden of dengue infections in India	InvaCost4
Economic burden of dengue virus infection at the household level among residents of Puerto Maldonado, Peru	InvaCost4
Economic cost and burden of dengue during epidemics and non-epidemic years in Taiwan	Systematic update
Economic cost and burden of dengue in the Philippines	InvaCost4
Economic cost of dengue in Puerto Rico	InvaCost4
Economic cost of dengue public prevention activities in Puerto Rico	InvaCost4
Economic costs and burden of dengue disease in Cavite Province, Philippines	InvaCost4
Economic Costs of Chikungunya Virus in Colombia.	InvaCost4
Economic evaluation of cases of dengue fever attributed to the disaster of 2011 in Nova Friburgo (State of Rio de Janeiro/Brazil)	InvaCost4
Economic evaluation of patient care in the epidemic of dengue.	Opp_update
Economic evaluation of the Zika contraception access network- a primary public health intervention to increase access to contraception in Puerto Rico during the 2016-17 Zika virus outbreak	Systematic update
Economic impact of chikungunya epidemic: ou-of-pocket health expenditures during the 2007 outbreak in Kerala, India	InvaCost4
Economic impact of dengue illness and the cost-effectiveness of future vaccination programs in Singapore	InvaCost4
Economic impact of dengue illness in the Americas	InvaCost4
Economic impact of dengue in Brazil over 10 years (2008-2017)	Systematic update
Economic impact of dengue in Mexico considering reported cases for 2012 to 2016	Systematic update
Economic impact of dengue in tourism in Brazil	Systematic update
Economic impact of dengue: multicenter study across four brazilian regions	InvaCost4
Economic report on the cost of dengue fever in Vietnam: case of a provincial hospital	Systematic update
Economic valuation of the threat posed by the establishment of the Asian Tiger Mosquito in Australia	Systematic update
Effectiveness and feasibility of long-lasting insecticide-treated curtains and water container covers for dengue vector control in Colombia: a cluster randomised trial.	InvaCost4
Em 5 anos, dengue custa R$ 4,2 bilhões à União	Opp_update
Epidemic dengue fever in Puerto Rico, 1977: A cost analysis	InvaCost4
Epidémie de dengue 1 en Polynésie Francaise 2001	Opp_update
Estimate of the costs of the dengue epidemic in 1994 in Nicaragua	Opp_update
Estimated operational costs of vaccination campaign to combat yellow fever in Abidjan	Systematic update
Estimating the burden of dengue in the Philippines using a dynamic transmission model	Systematic update
Estimating the burden of disease and the economic cost attributable to chikungunya, Andhra Pradesh, India, 2005-2006	InvaCost4
Estimating the burden of disease and the economic cost attributable to chikungunya, Colombia, 2014	InvaCost4
Estimating the burden of disease and the economic cost attributable to Zika, Colombia 2016	Systematic update
Estimating the cost of congenital Zika syndrome to families and healthcare providers in Rio de Janeiro and Pernambuco, Brazil: results of a case-control study	Opp_update
Estimating the cost of illness and burden of disease associated with the 2014-2015 chikungunya outbreak in the US Virgin Islands	Systematic update
EU continues to support Caribbean in fight against mosquito borne diseases	Opp_update
EU funded research projects on Zika	Opp_update
Evaluation of intensified dengue control measures with interrupted time series analysis in the Panadura Medical Officer of Health division in Sri Lanka: a case study and cost-effectiveness analysis	Systematic update
Examining the effect of publishing of bill sizes to reduce information asymmetry on healthcare costs.	InvaCost4
Final report. Yemen: dengue fever outbreak	Opp_update
Governo investirá R$649 milhões em pesquisa para combater o Aedes aegypti e o zika virus	Opp_update
Guillain-Barré syndrome associated with Zika virus infection in Brazil: a cost-of-illness study	Systematic update
Haiti chikungunya outbreak	Opp_update
Hemispheric plan to expand and intensify efforts to combat Aedes aegypti	InvaCost4
High household economic burden caused by hospitalization of patients with severe dengue fever cases in Can Tho province, Vietnam.	InvaCost4
Historical analysis of the economic cost of dengue in Australia.	InvaCost4
Household and Hospitalization Costs of Pediatric Dengue Illness in Colombo, Sri Lanka.
Household use of insecticide consumer products in a dengue-endemic area in Mexico	InvaCost4
Household-level expenditure on protective measures against mosquitoes on the island of La Réunion, France.	InvaCost4
Immediate cost of dengue to Malaysia and Thailand: an estimate	InvaCost4
Impact of an outbreak of dengue fever: a case study from rural Puerto Rico	InvaCost4
Impacto economico de la epidemia de dengue 2 en Santiago de Cuba -1997	InvaCost4
Impacto economico del brote de Chikungunya en la ciudad de Cucuta en el ano 2014	InvaCost4
Impacto Economico del dengue en el Instituto de Prevision Social: epidemia diciembre 2006 - julio 2007	InvaCost4
Impacto económico del dengue en México por regiones epidemiológicas	Opp_update
Impacto economico del dengue y del dengue hemorragico en el Estado de Zulia, Venezuela - 1997-2004	InvaCost4
Importes anuales del COFIB destinados al control de especies invasoras, Consorcio para la Recuperación de la Fauna de las Islas Baleares, Comunitat Autònoma de les Illes Balears (CAIB)	InvaCost4
Incremental cost of implementing residual insecticide treatment with delthametrine on top of intensive routine Aedes aegypti control	InvaCost4
Informe Individual sobre costos relacionados con la invasion de Mosquito tigre (Aedes aegypti) en Argentina.	InvaCost4
Investigational testing for Zika virus among U.S. blood donors.	Opp_update
Kenya dengue fever outbreak	Opp_update
Las especies exóticas invasoras en Cataluña	InvaCost4
Le Specie Aliene Invasive: Cosa E Come Comunicare Al Grande Pubblico	InvaCost4
Medical care costs of chikungunya virus infection in a pediatric population in Colombia	Systematic update
Microeconomic evaluation of a mass preventive immunisation campaign against meningococcal meningitis and yellow fever in Senegal in 1997	Systematic update
Mosquito control practices and perceptions: an analysis of economic stakeholders during the Zika epidemic in Belize, Central America	Systematic update
New cost-benefit of brazilian technology for vector surveillance using trapping system	Opp_update
No Effect of Insecticide Treated Curtain Deployment on Aedes Infestation in a Cluster Randomized Trial in a Setting of Low Dengue Transmission in Guantanamo, Cuba	Opp_update
On lifestyle trends, health and mosquitoes: formulating welfare levels for control of the Asian tiger mosquito in Greece	Systematic update
Out-of-pocket health expenditure and debt in poor households: evidence from Cambodia	InvaCost4
Overview of social communication expenses: a selected case of health sector in Mexico 2015-2017	Systematic update
Patient and national economic burden of dengue in Japan: results from japanese national claims database	Systematic update
Persistent Symptoms of Dengue: Estimates of the Incremental Disease and Economic Burden in Mexico	InvaCost4
Preliminary estimate of inmediate cost of chikungunya and dengue to Gujarat, india	InvaCost4
Prevalence of various symptoms and cost of treatment during the chikungunya epidemic in Ahmedabad, Gujarat, India in 2006	Opp_update
Proceedings of the CAREC/PAHO sub-regional dengue meeting	Opp_update
Projects funded by the American Red Cross Haiti Assistance Program	Opp_update
Protecting Australia from disease vectors: exotic mosquito management at the border	Opp_update
Proyecto de control y erradicacion de especies invasoras prioritarias para la reduccion de la vulnerabilidad de especies endemicas y nativas de las islas Galapagos	InvaCost4
Puerto Rico tourism industry feels economic sting of Zika	Opp_update
Quantifying the impact of chikungunya and dengue on tourism revenues	Systematic update
Republic of Congo chikugunya outbreak in Brazzaville, Pointe Noire and Pool	Opp_update
RETOUR D'EXPERIENCE SUR L'EPIDEMIE DE ZIKA EN POLYNESIE FRANCAISE EN 2014	InvaCost4
Rol del Laboratorio Nacional de Referencia en la epidemia de dengue, Colombia 2010	Opp_update
Selective Primary Health Care: Strategies for Control of Disease in the Developing World. XI. Dengue	InvaCost4
Severe dengue epidemic, Sri Lanka, 2017	Systematic update
Severity and costs associated with hospitalization for dengue in public and private hospitals of Surat city, Gujarat, India, 2017–2018	Systematic update
Short-term economic impact of the Zika virus outbreak	InvaCost4
Social Benefits From Controlling Invasive Asian Tiger and Native Mosquitoes: A Stated Preference Study in Athens, Greece	InvaCost4
Socio-economic impact of the 2019 dengue outbreaks in Brazil
St Lucia: dengue	Opp_update
St Vincent and the Grenadines: dengue outbreak	Opp_update
Strategies of a thirteen year surveillance programme on Aedes albopictus (Stegomyia albopicta) in southern Switzerland	InvaCost4
Surveillance of the chikungunya vector Aedes albopictus in Emilia Romagna (Northern Italy)	InvaCost4
Sustainability and cost of a community-based strategy against Aedes aegypti in Northern and Central Vietnam	InvaCost4
Technical support to EU strategy on invasive alien species (IAS) - Assessment of the impacts of IAS in Europe and the EU	InvaCost4
The burden of dengue and the financial cost to Colombia 2010-2012	Opp_update
The Chikungunya epidemic in Italy and its repercussion on the blood system	Opp_update
The Chikungunya Epidemic on La Reunion Island in 2005-2006: A Cost-of-Illness Study	InvaCost4
The containment of potential outbreaks triggered by imported Chikungunya cases in Italy: a cost utility epidemiological assessment of vector control measures.	InvaCost4
The Cost And Burden Of Chikungunya In The Americas	Opp_update
The Cost of Arbovirus Disease Prevention in Europe: Area-Wide Integrated Control of Tiger Mosquito, Aedes albopictus, in Emilia-Romagna, Northern Italy	InvaCost4
The cost of dengue haemorrhagic fever in Thailand.	InvaCost4
The cost of routine Aedes aegypti control and of insecticide-treated curtain implementation	InvaCost4
The economic burden of dengue fever in the Kingdom of Saudi Arabia	Systematic update
The economic value of informal care for dengue patients in Vietnam	Opp_update
The eradication of Aedes aegypti from Groote Eylandt NT Australia 2006-2008	Opp_update
The estimation of the economic damages caused as a consequence of the epidemic of hemorrhagic dengue in Cuba in 1981.	Systematic update
The feasibility of erradicating Aedes aegypti in the Americas	InvaCost4
The global economic burden of dengue: a systematic analysis	InvaCost4
The monetary value of human lives lost due to neglected tropical diseases in Africa	Opp_update
The potential economic burden of Zika in the continental United States	Opp_update
The short-term economic costs of Zika in Latin America and the Caribbean (LCR)	Opp_update
Total economic cost and burden of dengue in Nicaragua: 1996-2012	InvaCost4
Tourisme: la crise du chikungunya a coûté 500 emplois salariés	Systematic update
Unforseen costs of cutting mosquito surveillance budgets	Opp_update
Use of Multiple Data Sources to Estimate the Economic Cost of Dengue Illness in Malaysia	InvaCost4
Using disability-adjusted life years to assess the economic impact of dengue in Puerto Rico: 1984-1994	InvaCost4
Valuing the broader benefits of dengue vaccination, with a preliminary application to Brazil	InvaCost4
What explains the lacklustre response to Zika in Brazil? Exploring institutional, economic and health system context	Systematic update
WILLINGNESS-TO-PAY FOR AN AREA-WIDE INTEGRATED PEST MANAGEMENT PROGRAM TO CONTROL THE ASIAN TIGER MOSQUITO IN NEW JERSEY	InvaCost4
World Bank provides 150 million to combat Zika virus in Latin America and the Caribbean	Opp_update
Zika in Puerto Rico	Systematic update
Zika virus in Latin America and the Caribbean: US Policy consideration	Opp_update
