# Supplementary material for: The rising global economic costs of Aedes and Aedes-borne diseases
Source: Research Square preprint supplement (doi:10.21203/rs.3.rs-2679030/v1), 2023-03-17
Supplement: Supplementary file 2 [file f1488d510554db5ac95b79f4.xlsx]

## Sheet: HistoricaldatabaseAedesinvasion
Country	1977	1981	1984	1987	1990	1994	1995	1996	1997	1998	1999	2000	2001	2002	2003	2004	2005	2006	2007	2008	2009	2010	2011	2012	2013	2014	2015	2016	2017	2018	2019	2020	References aegypti	References albopictus	Only aegypti	Only albopictus	Both
Antigua & Barbuda								Aegypti	Aegypti																								1.4		x
Argentina								Aegypti				Aegypti/Albopictus															Aegypti/Albopictus	Aegypti/Albopictus					2	2			x (partially)
Australia					Aegypti											Aegypti	Aegypti/Albopictus	Aegypti/Albopictus		Aegypti/Albopictus													2	2			x (partially)
Bahamas									Aegypti																								1,2,3,4
Bangladesh	Aegypti/Albopictus																												Aegypti/Albopictus				2	2			x (widespread)
Barbados								Aegypti	Aegypti																		Aegypti						4		x
Belize							Aegypti		Aegypti			Aegypti									Aegypti/Albopictus	Aegypti/Albopictus	Aegypti/Albopictus	Aegypti/Albopictus	Aegypti/Albopictus	Aegypti/Albopictus	Aegypti/Albopictus	Aegypti/Albopictus	Aegypti/Albopictus	Aegypti/Albopictus	Aegypti/Albopictus	Aegypti/Albopictus	2	2			x (expanding)
Bhutan													Aegypti												Aegypti/Albopictus								6	6			x (widespread)
Bolivia							Aegypti	Aegypti	Aegypti			Aegypti															Aegypti						2		x
Brazil							Aegypti/Albopictus	Aegypti/Albopictus	Aegypti/Albopictus			Aegypti/Albopictus	Aegypti/Albopictus	Aegypti/Albopictus	Aegypti/Albopictus	Aegypti/Albopictus	Aegypti/Albopictus	Aegypti/Albopictus	Aegypti/Albopictus	Aegypti/Albopictus	Aegypti/Albopictus	Aegypti/Albopictus			Aegypti/Albopictus		Aegypti/Albopictus	Aegypti/Albopictus	Aegypti/Albopictus				2	2			x (widespread)
Brunei	Aegypti/Albopictus												Aegypti/Albopictus																				7	2.7			x (widespread)
Burkina Faso																											Aegypti						2	2	x
Cambodia	Aegypti												Aegypti/Albopictus					Aegypti/Albopictus									Aegypti/Albopictus						2	2			x (widespread)
Canada												Aegypti/Albopictus																					8	2.8			x (partially)
Chile																												Aegypti					9		x (partially)
China		Aegypti/Albopictus																							Aegypti/Albopictus	Aegypti/Albopictus							2	2			x (partially)
China (Taiwan)										Aegypti/Albopictus				Aegypti/Albopictus																			10	10			x (widespread)
Colombia							Aegypti	Aegypti	Aegypti	Aegypti/Albopictus		Aegypti/Albopictus										Aegypti/Albopictus	Aegypti/Albopictus	Aegypti/Albopictus	Aegypti/Albopictus	Aegypti/Albopictus	Aegypti/Albopictus						2	2.11			x (widespread)
Costa Rica							Aegypti	Aegypti	Aegypti			Aegypti							Aegypti/Albopictus						Aegypti/Albopictus		Aegypti/Albopictus						2	2.12			x (widespread)
Cuba		Aegypti				Aegypti/Albopictus		Aegypti/Albopictus	Aegypti/Albopictus			Aegypti/Albopictus			Aegypti/Albopictus			Aegypti/Albopictus			Aegypti/Albopictus		Aegypti/Albopictus				Aegypti/Albopictus						1.2	2.12			x (widespread)
Dominica									Aegypti																		Aegypti						1,2,4		x
Dominican Republic				Aegypti		Aegypti/Albopictus																	Aegypti/Albopictus				Aegypti/Albopictus						1,2,3	2.12			x (widespread)
East Timor													Aegypti/Albopictus																				13	13			x (widespread)
Ecuador							Aegypti	Aegypti	Aegypti			Aegypti													Aegypti		Aegypti		Aegypti/Albopictus				14	12			x (partially)
El Salvador							Aegypti	Aegypti	Aegypti			Aegypti															Aegypti						2		x
Fiji	Aegypti			Aegypti/Albopictus																					Aegypti/Albopictus								2	2			x (widespread)
France											Albopictus														Albopictus									2		x
France (French Guiana)									Aegypti			Aegypti													Aegypti								15		x
France (French Polynesia)	Aegypti				Aegypti			Aegypti					Aegypti												Aegypti								2		x
France (Guadeloupe)																									Aegypti								1,2,3		x
France (La Reunion)																	Albopictus	Albopictus			Albopictus	Albopictus	Albopictus	Albopictus	Albopictus									16		x	relicted Aegypti
France (Martinique)									Aegypti																Aegypti								1,2,3		x
France (Mayotte)																			Aegypti/Albopictus						Aegypti/Albopictus								17	17			x (widespread)
France (New Caledonia)	Aegypti														Aegypti									Aegypti	Aegypti								2		x
Greece																				Albopictus					Albopictus									2		x
Grenada									Aegypti																		Aegypti						1,2,3,4		x
Guatemala							Aegypti/Albopictus	Aegypti/Albopictus	Aegypti/Albopictus			Aegypti/Albopictus															Aegypti/Albopictus						2	2.12			x (widespread)
Guyana	Aegypti																										Aegypti						2		x
Haiti	Aegypti																					Aegypti/Albopictus				Aegypti/Albopictus	Aegypti/Albopictus	Aegypti/Albopictus					1,2,3	2.12			x (partially)
Honduras					Aegypti		Aegypti	Aegypti	Aegypti																								2		x
India	Aegypti/Albopictus														Aegypti/Albopictus		Aegypti/Albopictus	Aegypti/Albopictus	Aegypti/Albopictus						Aegypti/Albopictus			Aegypti/Albopictus	Aegypti/Albopictus				2	2			x (widespread)
Indonesia	Aegypti/Albopictus												Aegypti/Albopictus										Aegypti/Albopictus				Aegypti/Albopictus			Aegypti/Albopictus			2	2			x (widespread)
Italy																			Albopictus	Albopictus	Albopictus	Albopictus	Albopictus				Albopictus							2		x
Jamaica		Aegypti			Aegypti																						Aegypti	Aegypti		Aegypti/Albopictus			1,2,3	12			x (partially)
Japan																	Aegypti/Albopictus						Aegypti/Albopictus	Aegypti/Albopictus	Aegypti/Albopictus	Aegypti/Albopictus	Aegypti/Albopictus						2	2			x (widespread)
Kenya	Aegypti																											Aegypti					2		x
Laos																	Aegypti/Albopictus																2	2			x (partially)
Malaysia	Aegypti/Albopictus		Aegypti/Albopictus											Aegypti/Albopictus							Aegypti/Albopictus	Aegypti/Albopictus			Aegypti/Albopictus								2	2			x (widespread)
Maldives																			Aegypti/Albopictus								Aegypti/Albopictus						2	2			x (widespread)
Mexico		Aegypti			Aegypti/Albopictus		Aegypti/Albopictus	Aegypti/Albopictus	Aegypti/Albopictus			Aegypti/Albopictus								Aegypti/Albopictus		Aegypti/Albopictus	Aegypti/Albopictus	Aegypti/Albopictus	Aegypti/Albopictus	Aegypti/Albopictus	Aegypti/Albopictus	Aegypti/Albopictus					2	2.12			x (widespread)
Myanmar		Aegypti											Aegypti																				2		x
Netherlands (Aruba)									Aegypti	Aegypti	Aegypti																						1		x
Netherlands (Curacao)									Aegypti																								1		x
Netherlands (Sint Maarten)																									Aegypti								1		x
Nicaragua						Aegypti	Aegypti	Aegypti	Aegypti						Aegypti/Albopictus								Aegypti/Albopictus				Aegypti/Albopictus						2	2.12			x (partially)
Pakistan	Aegypti																						Aegypti/Albopictus						Aegypti/Albopictus				2.18	2.18			x (widespread)
Panama							Aegypti					Aegypti		Aegypti/Albopictus													Aegypti/Albopictus						2	2.12			x (partially)
Paraguay							Aegypti	Aegypti	Aegypti			Aegypti										Aegypti	Aegypti	Aegypti	Aegypti		Aegypti		Aegypti				2		x
Peru					Aegypti		Aegypti	Aegypti	Aegypti			Aegypti											Aegypti	Aegypti		Aegypti	Aegypti						2		x
Philippines	Aegypti/Albopictus																			Aegypti/Albopictus					Aegypti/Albopictus								2	2			x (widespread)
Republic of Congo	Aegypti																						Aegypti					Aegypti/Albopictus					2	2			x (widespread)
Saint Kitts and Nevis									Aegypti																								1,2,3,4		x
Saint Lucia									Aegypti																								4		x
Saint Vincent and the Grenadines									Aegypti																								1,2,4		x
Saudi Arabia																						Aegypti			Aegypti	Aegypti	Aegypti	Aegypti	Aegypti				2.18		x
Singapore	Aegypti/Albopictus	Aegypti/Albopictus										Aegypti/Albopictus	Aegypti/Albopictus																				2	2			x (widespread)
Spain																										Albopictus	Albopictus	Albopictus	Albopictus	Albopictus				2		x
Sri Lanka	Aegypti/Albopictus																							Aegypti/Albopictus		Aegypti/Albopictus			Aegypti/Albopictus				2	2			x (widespread)
Suriname			Aegypti									Aegypti															Aegypti						2		x
Switzerland												Albopictus					Albopictus				Albopictus													2		x
Thailand		Aegypti/Albopictus		Aegypti/Albopictus								Aegypti/Albopictus	Aegypti/Albopictus										Aegypti/Albopictus		Aegypti/Albopictus								2	2			x (widespread)
Trinidad and Tobago								Aegypti	Aegypti					Aegypti/Albopictus													Aegypti/Albopictus						1,2,3	2.12			x (partially)
UK (Anguilla)								Aegypti	Aegypti																								1,2,3,4		x
UK (Bermuda)									Aegypti			Aegypti/Albopictus																					5	5			x (partially)
UK (British Virgin Islands)									Aegypti																								1.4		x
UK (Cayman Islands)									Aegypti/Albopictus																								3	2.12			x (widespread)
UK (Montserrat)								Aegypti	Aegypti																								1		x
UK (Turks and Caicos)									Aegypti																								1		x
Uruguay							Aegypti					Aegypti		Aegypti/Albopictus																			2	2.12			x (partially)
US					Aegypti/Albopictus																Aegypti/Albopictus							Aegypti/Albopictus					2	2.12			x (partially)
US (Puerto Rico)	Aegypti		Aegypti		Aegypti				Aegypti					Aegypti														Aegypti					1,2,3		x
US (Virgin Islands)																										Aegypti	Aegypti						1		x
Venezuela	Aegypti							Aegypti	Aegypti	Aegypti	Aegypti	Aegypti	Aegypti	Aegypti	Aegypti				Aegypti		Aegypti/Albopictus						Aegypti/Albopictus						2	2.12			x (partially)
Vietnam	Aegypti									Aegypti/Albopictus			Aegypti/Albopictus										Aegypti/Albopictus		Aegypti/Albopictus	Aegypti/Albopictus	Aegypti/Albopictus		Aegypti/Albopictus				2	2			x (widespread)
Yemen																						Aegypti									Aegypti		2.18		x

## Sheet: References
ID	Authors	Year	Title	Journal	Volume	Pages
1	Knudsen	1983	Aedes aegypti and dengue in the caribbean	Mosquito News	43 (3)	269-275
2	Kraemer, M.U., Sinka, M.E., Duda, K.A., Mylne, A., Shearer, F.M., Brady, O.J., Messina, J.P., Barker, C.M., Moore, C.G., Carvalho, R.G. and Coelho, G.E.,	2015	The global compendium of Aedes aegypti and Ae. albopictus occurrence.	Scientific Data	2(1)	1-8
3	Chadee D., Ward R., Novak R.	1998	Natural habitats of Aedes aegypti in the caribbean- a review	Journal of the American Mosquito Control Association	14(1)	5-11
4	Nathan M., Knudsen B.	1991	Aedes aegypti infestation characteristics in several caribbean countries and implications for integrated community-based control	Journal of the American Mosquito Control Association	7 (3)	400-404
5	Kaplan L., Kendell D., Robertson D., Livdahl T., Khatchikian C.	2010	Aedes aegypti and Aedes albopictus in Bermuda: extinction, invasion and extinction	Biological Invasions	12	3277-3288
6	Zangmo, S., Klungthong, C., Chinnawirotpisan, P., Tantimavanich, S., Kosoltanapiwat, N., Thaisomboonsuk, B., Phuntsho, K., Wangchuk, S., Yoon, I.K. and Fernandez, S.	2015	Epidemiological and molecular characterization of dengue virus circulating in Bhutan, 2013-2014.	PLoS Neglected Tropical Diseases	9(8)	e0004010
7	Macdonald, W.W. and Rajapaksa, N.	1972	A survey of the distribution and relative prevalence of Aedes aegypti in Sabah, Brunei, and Sarawak	Bulletin of the World Health Organization	46(2)	203
8	Giordano, B.V., Gasparotto, A., Liang, P., Nelder, M.P., Russell, C. and Hunter, F.F.	2020	Discovery of an Aedes (Stegomyia) albopictus population and first records of Aedes (Stegomyia) aegypti in Canada	Medical and veterinary entomology	34(1)	10-16
9	González, C.R., Henry, A., Reyes, C., Aylwin, M.P., Escobar, D., Fernández, J. and Saldarriaga-Córdoba, M.	2016	Reintroducción del invasivo mosquito Aedes aegypti (Linnaeus)(Diptera: Culicidae) en el norte de Chile.	Idesia (Arica)	34(4)	49-53
10	Tsai, P.J. and Teng, H.J.	2016	Role of Aedes aegypti (Linnaeus) and Aedes albopictus (Skuse) in local dengue epidemics in Taiwan.	BMC infectious diseases	16(1)	1-20
11	Echeverry-Cárdenas, E., López-Castañeda, C., Carvajal-Castro, J.D. and Aguirre-Obando, O.A.	2021	Potential geographic distribution of the tiger mosquito Aedes albopictus (Skuse, 1894)(Diptera: Culicidae) in current and future conditions for Colombia.	PLoS Neglected Tropical Diseases	15(5)	e0008212.
12	Garcia-Rejon, J.E., Navarro, J.C., Cigarroa-Toledo, N. and Baak-Baak, C.M.	2021	An Updated Review of the Invasive Aedes albopictus in the Americas; Geographical Distribution, Host Feeding Patterns, Arbovirus Infection, and the Potential for Vertical Transmission of Dengue Virus.	Insects	12(967)	1-13
13	Whelan P., Hapgood G.	2000	A mosquito survey of Dili, East Timor, and implications for disease control	Arbovirus research in Australia	8	405-416
14	Lippi CA, Stewart-Ibarra AM, Loor MF, Zambrano JE, Lopez NA, Blackburn JK, Ryan SJ. 2019 Apr 17;13(4):e0007322.	2019	Geographic shifts in Aedes aegypti habitat suitability in Ecuador using larval surveillance data and ecological niche modeling: Implications of climate change for public health vector control.	PLoS Neglected Tropical Diseases	13(4)	e0007322
15	Fouque F., Carinci R	1996	Aedes aegypti in French Guiana. Some aspects of history, general ecology and vertical transmission of the dengue virus	Bulletin de la Societe de Pathologie Exotique	89(2)	115-119
16	Boyer S, Foray C, Dehecq JS.	2014	Spatial and temporal heterogeneities of Aedes albopictus density in La Reunion Island: rise and weakness of entomological indices	PLoS One	17;9(3)	e91170
17	Bagny Beilhe L, Arnoux S, Delatte H, Lajoie G, Fontenille D.	2012	Spread of invasive Aedes albopictus and decline of resident Aedes aegypti in urban areas of Mayotte 2007–2010	Biological Invasions	14(8)	1623-33
18	Ducheyne, E., Tran Minh, N. N., Haddad, N., Bryssinckx, W., Buliva, E., Simard, F.,& Roiz, D.	2018	Current and future distribution of Aedes aegypti and Aedes albopictus (Diptera: Culicidae) in WHO Eastern Mediterranean Region.	International Journal of Health Geographics	17(1)	1-13
